# Supplementary material
Source: Springer Nature journal article supplement (https://www.springermedizin.de/resource/supplementary/13229_2009_3_MOESM1_ESM.pdf/9675978)

HLOD

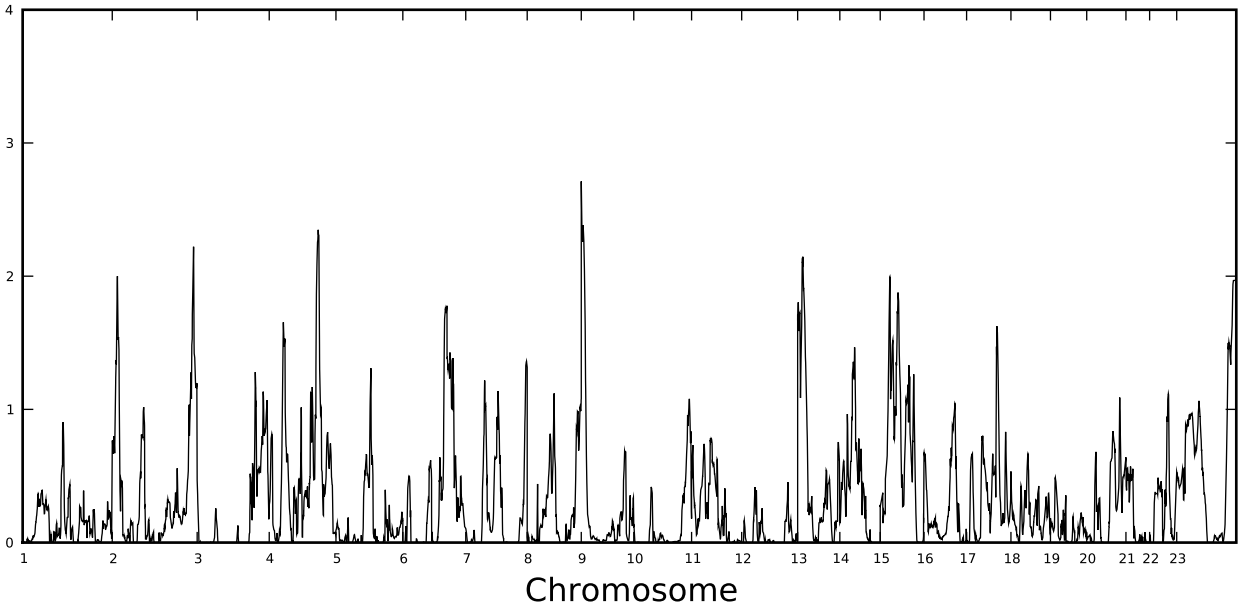

Supplement: MOESM1 [file 9675978]
